# Supplementary material for: Diagnostic Strategies for Recurrent Cervical Cancer: A Cohort Study
Source: Front Oncol. 2020 Dec 7;10:591253. doi: 10.3389/fonc.2020.591253 (PMC7750634; doi:10.3389/fonc.2020.591253)
Supplement: Supplementary file 1 [file Table_1.xlsx]

## Sheet: Raw data
Supplementary Table 1
Details of all patients with recurrent cervical cancer.
Patients No.	Characteristics of recurrent sites	Histological subtypes	Diagnostic regimens	Staging categories	Date of birth	Age of initial diagnosis	Date of initial diagnosis	Date of first recurrence diagnosis	DFS	FIGO 2009 staging	Recurrent sites in the initial diagnosis of FIGO stage IV patients	Histological differentiation of prmary squamous cell carcinoma/adenocarcinoma	Primary treatment regimens	Neoadjuvant therapy	Neoadjuvant therapy regimens	Definite adjuvant after primary treatment	Definite adjuvant after primary treatment regimens	Definite adjuvant after primary treatment regimens details	Surgical routes at the initial treatment	Surgical protocols for initial treatment	Ovarian reservation	Diagnostic regimens for recurrence - symptoms	Diagnostic regimens for recurrence - serum tumor markers	Diagnostic regimens for recurrence - imaging	Recurrent sites	Solitary recurrent site	Recurrence confirmed by pathology
CC000001	Only within pelvic cavity, multiply lesions	adenocarcinoma	Symptoms	Early stage	1973-08-13	44	2010-06-08	2018-05-01	96.1333	CIS			Surgery	No		No			Open surgery	Hysterectomy	Yes	abdominal pain			Iliac lymph nodes	No	No
CC000022	Only within pelvic cavity, multiply lesions	adenocarcinoma	Symptoms	Early stage	1983-03-17	34	2014-10-20	2016-06-17	20.2	IA1		Grade 2	Surgery	No		No			transvaginal	Cone	Yes	vaginal bleeding			Uterine cervix	No	Yes
CC000004	Only within pelvic cavity, multiply lesions	squamous cell carcinoma	Symptoms	Early stage	1980-02-07	36	2013-07-01	2016-04-01	33.5	IA1			Surgery	No		No			Open surgery	Hysterectomy	Yes	vaginal bleeding			Vaginal stump，Iliac lymph nodes	No	Yes
CC000013	Only within pelvic cavity, multiply lesions	squamous cell carcinoma	Symptoms	Early stage	1951-02-15	66	2011-12-01	2015-02-01	38.6	IA1			Surgery	No		No			Open surgery	Hysterectomy	No	vaginal bleeding			Vaginal stump	No	Yes
CC000017	Only within pelvic cavity, multiply lesions	squamous cell carcinoma	Symptoms	Early stage	1972-05-29	42	2009-05-01	2014-02-01	57.9	IA1			Surgery	No		No			Open surgery	Hysterectomy	Yes	lower limbs pain, lower limbs swelling			Pelvic cavity, Pelvic wall	No	No
CC000259	Only within pelvic cavity, multiply lesions	squamous cell carcinoma	Symptoms	Early stage	1972-12-01	43	2011-01-17	2016-06-01	65.4	IA1			Surgery	No		No			Open surgery	Hysterectomy	Yes	abdominal pain			Vagina, Bladder	No	Yes
CC000019	Only within pelvic cavity, multiply lesions	squamous cell carcinoma	Symptoms	Early stage	1953-12-26	62	2010-09-01	2016-12-01	76.1	IA1			Surgery	No		No			Open surgery	Hysterectomy	No	vaginal bleeding			Vaginal stump, Rectum	No	Yes
CC000015	Only within pelvic cavity, multiply lesions	adenocarcinoma	Cervical cytology with/without hrHPV	Early stage	1947-11-14	68	2012-04-12	2016-01-10	45.6	IA1			Surgery	No		No			laparoscopy	Hysterectomy	No				Vaginal stump, Vagina	No	No
CC000028	Only within pelvic cavity, multiply lesions	adenocarcinoma	Imaging	Early stage	1979-05-21	37	2015-04-01	2016-09-09	17.5667	IB1		Grade 1	Surgery	No		Yes	Chemotherapy	Chemotherapy	laparoscopy	RH	No			CT	Pelvic wall, Ureter	No	Yes
CC000026	Only within pelvic cavity, multiply lesions	squamous cell carcinoma	Imaging	Early stage	1972-08-10	46	2017-11-01	2018-07-01	8.06667	IB1		Grade 3	Only CCRT	No		No								PET-CT	Uterine cervix	No	No
CC000025	Only within pelvic cavity, multiply lesions	squamous cell carcinoma	Symptoms	Early stage	1963-04-09	52	2014-12-09	2015-10-01	9.86667	IB1		Grade 2	Surgery	No		Yes	Chemotherapy	Chemotherapy	laparoscopy	RH	No	abdominal pain, backache			Vaginal stump, Ureter	No	No
CC000037	Only within pelvic cavity, multiply lesions	squamous cell carcinoma	Imaging	Early stage	1973-04-19	45	2018-02-01	2018-08-27	6.9	IB1		Grade 3	Surgery	No		No			laparoscopy	RH	Yes			MRI	Vaginal stump, Bladder	Yes	No
CC000057	Only within pelvic cavity, multiply lesions	squamous cell carcinoma	Imaging	Early stage	1970-04-28	47	2016-07-01	2017-07-01	12.1667	IB1			Surgery	No		Yes	Chemotherapy plus radiotherapy	Radiotherapy plus chemotherapy	Open surgery	RH	No			PET-CT	Iliac lymph nodes	No	Yes
CC000033	Only within pelvic cavity, multiply lesions	Adenosquamous carcinoma	Imaging	Early stage	1979-7--26	34	2009-10-01	2013-06-18	45.2	IB1			Surgery	No		No			laparoscopy plus transvaginal	RT	Yes			PET-CT	Corpus uteri, Rectum, Ovary	No	Yes
CC000056	Only within pelvic cavity, multiply lesions	squamous cell carcinoma	Imaging	Early stage	1963-08-06	51	2014-02-24	2015-02-10	11.7	IB1		Grade 2	Surgery	No		No			laparoscopy	RH	No			sonography ultrosound	Vaginal stump, Bladder, Vagina, Ureter, Obturator internal muscle	No	No
CC000058	Only within pelvic cavity, multiply lesions	squamous cell carcinoma	Imaging	Early stage	1971-03-04	44	2014-10-16	2015-10-19	12.2667	IB1		Grade 2	Surgery	No		No			laparoscopy	RH	Yes			sonography ultrosound	Vaginal stump	No	No
CC000071	Only within pelvic cavity, multiply lesions	Adenosquamous carcinoma	Imaging	Early stage	1950-08-29	63	2011-09-05	2013-06-14	21.6	IB1			Surgery	No		Yes	Chemotherapy	Chemotherapy	Open surgery	RH	No			sonography ultrosound	Pelvic wall	No	No
CC000083	Only within pelvic cavity, multiply lesions	squamous cell carcinoma	Imaging	Early stage	1975-7--5	42	2016-01-01	2018-04-02	27.4	IB1		Grade 2	Surgery	No		No			Open surgery	RH	Yes			sonography ultrosound	Pelvic cavity, Ureter	No	Yes
CC000088	Only within pelvic cavity, multiply lesions	squamous cell carcinoma	Imaging	Early stage	1977-03-01	40	2014-08-01	2017-07-01	35.5	IB1		Grade 3	Surgery	No		No			laparoscopy	RH	Yes			sonography ultrosound	Vaginal stump, Rectum, Iliac lymph nodes	No	Yes
CC000036	Only within pelvic cavity, multiply lesions	squamous cell carcinoma	Symptoms	Early stage	1956-08-06	56	2011-01-21	2011-07-18	5.93333	IB1		Grade 2	Surgery	No		No			laparoscopy	RH	No	abdominal distention			Vagina, Rectum, Lymph nodes around intestine	No	Yes
CC000047	Only within pelvic cavity, multiply lesions	squamous cell carcinoma	Symptoms	Early stage	1969-04-19	48	2016-10-01	2017-07-01	9.1	IB1		Grade 3	Surgery	No		Yes	Chemotherapy plus radiotherapy	Radiotherapy plus chemotherapy	laparoscopy	RH	No	backache			Rectum, Vagina	No	Yes
CC000049	Only within pelvic cavity, multiply lesions	squamous cell carcinoma	Symptoms	Early stage	1960-02-23	55	2014-10-01	2015-07-01	9.1	IB1		Grade 3	Surgery	No		Yes	Chemotherapy	Chemotherapy	Open surgery	RH	No	Abnormal urination (dysuria), abnormal defecation (diarrhea)			Vaginal stump, Iliac lymph nodes	No	No
CC000054	Only within pelvic cavity, multiply lesions	squamous cell carcinoma	Symptoms	Early stage	1963-02-21	55	2016-09-01	2017-08-01	11.1333	IB1			Surgery	No		No			Open surgery	RH	No	backache			Vaginal stump, Iliac lymph nodes	No	No
CC000101	Only within pelvic cavity, multiply lesions	squamous cell carcinoma	Symptoms	Early stage	1956-12-01	61	2016-12-27	2018-06-26	18.2	IB1		Grade 2	Surgery	No		Yes	Chemotherapy	Chemotherapy	Open surgery	RH	No	contact vaginal bleeding			Vagina, Vaginal stump	No	No
CC000072	Only within pelvic cavity, multiply lesions	squamous cell carcinoma	Symptoms	Early stage	1981-06-28	33	2012-02-01	2013-12-01	22.3	IB1		Grade 3	Surgery	No		No			Open surgery	RT	Yes	backache			Pelvic cavity	No	No
CC000081	Only within pelvic cavity, multiply lesions	squamous cell carcinoma	Symptoms	Early stage	1962-06-24	55	2015-05-01	2017-07-03	26.4667	IB1		Grade 2	Surgery	No		No			laparoscopy plus transvaginal	RH	No	vaginal bleeding			Uterine cervix	No	No
CC000086	Only within pelvic cavity, multiply lesions	squamous cell carcinoma	Symptoms	Early stage	1976-05-17	38	2011-01-28	2013-09-01	31.5667	IB1		Grade 2	Surgery	No		No			laparoscopy plus transvaginal	RT	Yes	contact vaginal bleeding			Uterine cervix, Iliac lymph nodes	No	Yes
CC000103	Only within pelvic cavity, multiply lesions	adenocarcinoma	Symptoms	Early stage	1964-08-09	50	2010-04-01	2013-12-20	45.3	IB1		Grade 2	Surgery	No		Yes	CCRT	Radiotherapy	Open surgery	RH	No	vaginal bleeding			Vaginal stump, Bladder	No	Yes
CC000094	Only within pelvic cavity, multiply lesions	Adenosquamous carcinoma	Symptoms	Early stage	1965-06-21	50	2009-05-01	2015-12-01	80.1667	IB1		Grade 2	Surgery	No		No			Open surgery	RH	Yes	abdominal pain			Uterine cervix	No	No
CC000096	Only within pelvic cavity, multiply lesions	Adenosquamous carcinoma	Symptoms	Early stage	1980-10-16	32	2001-04-01	2012-08-23	138.733	IB1		Grade 3	Surgery	No		No			Open surgery	RT	Yes	backache, abnormal defecation (constipation), abnormal urination (oliguria)			Urethra, Bladder	No	No
CC000055	Only within pelvic cavity, multiply lesions	squamous cell carcinoma	Physical examination	Early stage	1981-04-20	36	2016-12-02	2017-11-03	11.2	IB1		Grade 2	Surgery	No		Yes	Chemotherapy	Chemotherapy	laparoscopy	RT	Yes				Uterine cervix	No	Yes
CC000137	Only within pelvic cavity, multiply lesions	squamous cell carcinoma	Imaging	LACC	1974-10-20	43	2017-06-01	2018-04-05	10.2667	IB2			Only CCRT	No		No								MRI	Iliac lymph nodes	No	No
CC000110	Only within pelvic cavity, multiply lesions	squamous cell carcinoma	Imaging	LACC	1983-08-10	35	2018-01-16	2018-07-27	6.4	IB2		Grade 3	Surgery	No		Yes	Chemotherapy	Chemotherapy	laparoscopy	RH	Yes			sonography ultrosound	Vaginal stump, Iliac lymph nodes	No	Yes
CC000112	Only within pelvic cavity, multiply lesions	squamous cell carcinoma	Imaging	LACC	1970-06-05	47	2017-01-16	2017-11-01	9.63333	IB2		Grade 2	Surgery	No		No			laparoscopy	RH	No			sonography ultrosound	Vaginal stump, Iliac lymph nodes	No	No
CC000121	Only within pelvic cavity, multiply lesions	squamous cell carcinoma	Imaging	LACC	1975-09-16	41	2015-07-08	2016-10-20	15.6667	IB2		Grade 3	Surgery	No		Yes	CCRT	Radiotherapy	Open surgery	RH	Yes			sonography ultrosound	Pelvic cavity	No	No
CC000132	Only within pelvic cavity, multiply lesions	squamous cell carcinoma	Imaging	LACC	1970-04-04	45	2012-06-01	2015-03-09	33.7	IB2		Grade 2	Surgery	No		No			Open surgery	RH	No			sonography ultrosound	Pelvic cavity	No	Yes
CC000118	Only within pelvic cavity, multiply lesions	squamous cell carcinoma	Serum biomarker	LACC	1954-10-29	61	2015-05-29	2016-06-01	12.3	IB2			Surgery	No		Yes	CCRT	Radiotherapy	Open surgery	RH	No		SCCAg		Pelvic peritoneum, Sacrum, Ureter	Yes	Yes
CC000106	Only within pelvic cavity, multiply lesions	squamous cell carcinoma	Symptoms	LACC	1972-09-20	41	2014-03-01	2014-08-01	5.1	IB2		Grade 3	Surgery	No		Yes	Radiotherapy	Radiotherapy	Open surgery	RH	No	lower extremity pain			Bladder, Ureter, Rectum, Iliac lymph nodes	No	No
CC000107	Only within pelvic cavity, multiply lesions	squamous cell carcinoma	Symptoms	LACC	1974-03-02	38	2012-01-01	2012-06-06	5.23333	IB2		Grade 3	Surgery	No		No			Open surgery	RH	Yes	abdominal pain			Iliac lymph nodes, Ureter	No	Yes
CC000114	Only within pelvic cavity, multiply lesions	squamous cell carcinoma	Symptoms	LACC	1964-7--15	50	2014-04-01	2015-02-01	10.2	IB2		Grade 3	Surgery	No		Yes	Radiotherapy	Radiotherapy	Open surgery	RH	No	vaginal bleeding			Vaginal stump, Iliac lymph nodes	No	No
CC000115	Only within pelvic cavity, multiply lesions	squamous cell carcinoma	Symptoms	LACC	1962-01-04	55	2015-04-29	2016-03-31	11.2333	IB2			Surgery	No		No			laparoscopy	RH	No	abdominal pain			Pelvic cavity	Yes	Yes
CC000116	Only within pelvic cavity, multiply lesions	squamous cell carcinoma	Symptoms	LACC	1965-08-08	49	2013-12-21	2014-12-01	11.5	IB2			Surgery	No		No			Open surgery	RH	No	abnormal defecation (dysdefecation)			Uterine cervix	No	No
CC000119	Only within pelvic cavity, multiply lesions	squamous cell carcinoma	Physical examination	LACC	1978-10-24	39	2017-03-01	2018-06-01	15.2333	IB2		Grade 3	Surgery	No		Yes	Radiotherapy	Radiotherapy	laparoscopy	RH	Yes				Pelvic cavity	No	No
CC000262	Only within pelvic cavity, multiply lesions	squamous cell carcinoma	Symptoms	LACC	1973-04-25	42	1999-03-01	2014-06-05	185.833	IB2			Only radiotherapy	No		No						vaginal discharge			Corpus uteri, Uterine cervix, Vagina	No	Yes
CC000154	Only within pelvic cavity, multiply lesions	squamous cell carcinoma	Imaging	LACC	1962-7--9	56	2008-03-01	2018-07-21	126.467	IIA		Grade 2	Surgery	No		No			Open surgery	RH	No			sonography ultrosound	Pelvic wall, Pelvic cavity	No	No
CC000150	Only within pelvic cavity, multiply lesions	squamous cell carcinoma	Serum biomarker	LACC	1964-02-02	50	2011-01-01	2014-02-01	37.5667	IIA			Surgery	No		Yes	Chemotherapy	Chemotherapy	Open surgery	RH	Yes		SCCAg		Vaginal stump	No	No
CC000139	Only within pelvic cavity, multiply lesions	squamous cell carcinoma	Symptoms	LACC	1971-01-16	41	2011-07-01	2011-10-01	3.06667	IIA		Grade 2	Surgery	No		Yes	Radiotherapy	Radiotherapy	Open surgery	RH	Yes	vaginal discharge			Bladder, Rectum	No	No
CC000155	Only within pelvic cavity, multiply lesions	adenocarcinoma	Symptoms	LACC	1941-01-22	71	2008-05-01	2011-05-06	36.6667	IIA		Grade 1	Surgery	No		No			Open surgery	RH	No	Abnormal urination (hematuria, dysuria), abnormal defecation (dysuria)			Bladder, Rectum	No	No
CC000151	Only within pelvic cavity, multiply lesions	squamous cell carcinoma	Symptoms	LACC	1946-03-20	69	2012-05-01	2016-01-10	44.9667	IIA		Grade 2	Surgery	No		Yes	Chemotherapy	Chemotherapy	Open surgery	RH	No	vaginal bleeding			Vagina, Vaginal stump	No	No
CC000153	Only within pelvic cavity, multiply lesions	squamous cell carcinoma	Symptoms	LACC	1968-04-12	46	2004-03-04	2013-12-01	118.633	IIA			Surgery	No		Yes	Chemotherapy	Chemotherapy	Open surgery	RH	No	abdominal pain			Pelvic cavity	Yes	Yes
CC000152	Only within pelvic cavity, multiply lesions	squamous cell carcinoma	Physical examination	LACC	1950-11-25	64	2010-02-24	2014-05-01	50.9	IIA		Grade 3	Surgery	No		Yes	Chemotherapy	Chemotherapy	Open surgery	RT	Yes				Vagina, Vaginal stump	No	No
CC000194	Only within pelvic cavity, multiply lesions	adenocarcinoma	Imaging	LACC	1967-11-07	49	2016-07-28	2017-07-03	11.3333	IIB			Only CCRT	No		No								PET-CT	Uterine cervix, Corpus uteri, Parametrium, Ureter, Ovary	Yes	Yes
CC000185	Only within pelvic cavity, multiply lesions	squamous cell carcinoma	Imaging	LACC	1965-05-20	52	2017-06-12	2018-02-26	8.63333	IIB			Only CCRT	No		No								CT	Parametrium, Pelvic wall	Yes	Yes
CC000202	Only within pelvic cavity, multiply lesions	squamous cell carcinoma	Imaging	LACC	1961-08-30	54	2014-02-14	2015-05-06	14.8667	IIB		Grade 2	Only CCRT	No		No								CT	Iliac lymph nodes, Pelvic cavity	Yes	Yes
CC000224	Only within pelvic cavity, multiply lesions	squamous cell carcinoma	Imaging	LACC	1966-09-24	52	2015-04-30	2018-03-01	34.5333	IIB			Only CCRT	No		No								CT	Parametrium, Rectum	No	Yes
CC000207	Only within pelvic cavity, multiply lesions	squamous cell carcinoma	Cervical cytology with/without hrHPV	LACC	1975-04-08	42	2016-10-01	2018-01-29	16.1667	IIB		Grade 2	Only CCRT	No		No									Uterine cervix, Vagina	No	Yes
CC000234	Only within pelvic cavity, multiply lesions	squamous cell carcinoma	Cervical cytology with/without hrHPV	LACC	1959-02-02	58	2007-05-06	2017-11-21	128.4	IIB		Grade 2	Only CCRT	No		No									Uterine cervix	Yes	Yes
CC000191	Only within pelvic cavity, multiply lesions	squamous cell carcinoma	Physical examination	LACC	1952-09-10	64	2016-08-10	2017-06-01	9.83333	IIB		Grade 1	Only CCRT	No		No									Uterine cervix	No	No
CC000236	Only within pelvic cavity, multiply lesions	squamous cell carcinoma	Physical examination	LACC	1960-06-10	57	2016-08-01	2017-10-03	14.2667	IIB		Grade 2	Only CCRT	No		No									Vagina, Vaginal stump	No	Yes
CC000171	Only within pelvic cavity, multiply lesions	squamous cell carcinoma	Symptoms	LACC	1966-05-06	51	2016-12-26	2017-05-01	4.2	IIB			Only CCRT	No		No						lower limbs swelling			Iliac lymph nodes, Ureter	No	No
CC000189	Only within pelvic cavity, multiply lesions	squamous cell carcinoma	Symptoms	LACC	1963-02-27	53	2015-07-01	2016-04-08	9.4	IIB		Grade 3	Chemotherapy plus CCRT	No		No						vaginal discharge			Uterine cervix, Vagina, Iliac lymph nodes	No	No
CC000168	Only within pelvic cavity, multiply lesions	squamous cell carcinoma	Symptoms	LACC	1963-7--2	50	2012-05-07	2012-12-01	6.93333	IIB		Grade 3	Only CCRT	No		No						backache, abnormal defecation (diarrhea)			Uterine cervix, Rectum, Vagina, Lymph nodes around intestine	No	Yes
CC000193	Only within pelvic cavity, multiply lesions	squamous cell carcinoma	Symptoms	LACC	1963-01-28	54	2016-03-02	2017-01-17	10.7	IIB		Grade 2	Only CCRT	No		No						vaginal bleeding			Uterine cervix, Iliac lymph nodes	No	Yes
CC000208	Only within pelvic cavity, multiply lesions	squamous cell carcinoma	Symptoms	LACC	1963-11-29	53	2015-05-01	2016-09-06	16.4667	IIB		Grade 2	Only CCRT	No		No						vaginal bleeding			Uterine cervix, Vagina, Iliac lymph nodes	No	Yes
CC000226	Only within pelvic cavity, multiply lesions	squamous cell carcinoma	Symptoms	LACC	1945-09-23	72	2013-11-01	2017-03-01	40.5333	IIB		Grade 3	Only CCRT	No		No						vaginal bleeding			Vagina, Urethra, Bladder	No	No
CC000235	Only within pelvic cavity, multiply lesions	squamous cell carcinoma	Symptoms	LACC	1954-08-11	58	1991-03-01	2011-09-01	249.633	IIB		Grade 1	Only CCRT	No		No						vaginal bleeding			Uterine cervix, Vagina	No	Yes
CC000239	Only within pelvic cavity, multiply lesions	adenocarcinoma	Symptoms	LACC	1963-03-12	51	2012-09-12	2014-01-21	16.5333	IIB			Chemotherapy plus CCRT	No		No						vaginal bleeding			Uterine cervix	No	Yes
CC000228	Only within pelvic cavity, multiply lesions	adenocarcinoma	Symptoms	LACC	1975-12-12	37	2008-07-01	2011-11-01	40.6	IIB		Grade 1	Chemotherapy plus CCRT	No		No						vaginal bleeding			Uterine cervix, Bladder, Vagina	No	No
CC000237	Only within pelvic cavity, multiply lesions	squamous cell carcinoma	Physical examination	LACC	1962-06-06	55	2017-08-01	2018-03-01	7.06667	IIB		Grade 3	Surgery	No		Yes	CCRT	Radiotherapy	Open surgery	RH	No				Vagina, Iliac lymph nodes	No	Yes
CC000198	Only within pelvic cavity, multiply lesions	squamous cell carcinoma	Physical examination	LACC	1974-08-25	41	2014-08-01	2015-09-08	13.4333	IIB			Surgery	No		No			Open surgery	RH	Yes				Vagina, Vaginal stump	No	No
CC000170	Only within pelvic cavity, multiply lesions	squamous cell carcinoma	Symptoms	LACC	1957-08-02	55	2007-05-03	2012-05-23	61.5667	IIB		Grade 3	Only chemotherapy	No		Yes	Chemotherapy plus hysterectomy	Chemotherapy	Open surgery	Hysterectomy	No	abnormal defecation (dysdefecation)			Uterine cervix, Levator ani muscle	No	Yes
CC000246	Only within pelvic cavity, multiply lesions	squamous cell carcinoma	Imaging	Advanced stage	1964-10-29	53	2016-11-30	2017-11-30	12.1667	IIIB			Only CCRT	No		No								MRI	Corpus uteri, Uterine cervix, Bladder, Vagina	No	No
CC000242	Only within pelvic cavity, multiply lesions	squamous cell carcinoma	Symptoms	Advanced stage	1951-01-20	63	1997-08-01	2014-10-01	209	IIIB			Only CCRT	No		No						vaginal bleeding			Uterine cervix	No	No
CC000253	Only within pelvic cavity, multiply lesions	adenocarcinoma	Imaging	Advanced stage	1968-02-29	48	2016-03-01	2016-07-19	4.66667	IVA	rectum		Only CCRT	No		No								PET-CT	Uterine cervix, Bladder, Rectum, Corpus uteri	No	No
CC000005	Only within pelvic cavity, solitary lesion	squamous cell carcinoma	Imaging	Early stage	1958-01-16	58	2015-05-21	2016-06-28	13.4667	IA1			Surgery	No		No			laparoscopy	Hysterectomy	No			sonography ultrosound	Vaginal stump	No	No
CC000006	Only within pelvic cavity, solitary lesion	squamous cell carcinoma	Symptoms	Early stage	1955-03-02	61	2015-06-01	2015-09-08	3.3	IA1			Surgery	No		No			laparoscopy	Hysterectomy	No	contact vaginal bleeding			Vaginal stump	No	Yes
CC000014	Only within pelvic cavity, solitary lesion	adenocarcinoma	Symptoms	Early stage	1960-11-23	53	2010-11-29	2014-06-01	42.6667	IA1			Surgery	No		No			laparoscopy	Hysterectomy	No	contact vaginal bleeding			Vaginal stump	No	No
CC000018	Only within pelvic cavity, solitary lesion	squamous cell carcinoma	Symptoms	Early stage	1967-12-10	47	2008-09-25	2014-02-12	65.5333	IA1			Surgery	No		No			laparoscopy	Hysterectomy	No	vaginal bleeding			Vaginal stump	Yes	Yes
CC000002	Only within pelvic cavity, solitary lesion	squamous cell carcinoma	Physical examination	Early stage	1966-10-22	51	2017-06-28	2017-10-01	3.16667	IA1			Surgery	No		No			Open surgery	Hysterectomy	Yes				Vaginal stump	No	No
CC000007	Only within pelvic cavity, solitary lesion	squamous cell carcinoma	Physical examination	Early stage	1980-05-19	37	2017-07-01	2017-10-09	3.33333	IA1			Surgery	No		No			laparoscopy	Hysterectomy	Yes				Vaginal stump	Yes	Yes
CC000003	Only within pelvic cavity, solitary lesion	squamous cell carcinoma	Physical examination	Early stage	1941-03-12	74	2015-09-01	2016-02-23	5.83333	IA1			Surgery	No		No			laparoscopy	Hysterectomy	No				Vaginal stump	No	No
CC000010	Only within pelvic cavity, solitary lesion	squamous cell carcinoma	Physical examination	Early stage	1964-09-02	51	2013-04-01	2015-04-01	24.3333	IA1			Surgery	No		No			Open surgery	Hysterectomy	Yes				Vaginal stump	No	Yes
CC000012	Only within pelvic cavity, solitary lesion	squamous cell carcinoma	Physical examination	Early stage	1975-05-11	37	2009-07-01	2012-05-01	34.5	IA1			Surgery	No		No			Open surgery	Hysterectomy	Yes				Vaginal stump	Yes	Yes
CC000016	Only within pelvic cavity, solitary lesion	squamous cell carcinoma	Physical examination	Early stage	1958-11-22	58	2013-01-16	2017-04-07	51.4	IA1			Surgery	No		No			laparoscopy	Hysterectomy	No				Vaginal stump	Yes	Yes
CC000011	Only within pelvic cavity, solitary lesion	squamous cell carcinoma	Cervical cytology with/without hrHPV	Early stage	1966-05-08	52	2009-03-01	2011-04-01	25.3667	IA1			Surgery	No		No			laparoscopy	Hysterectomy	Yes				Vaginal stump	Yes	Yes
CC000270	Only within pelvic cavity, solitary lesion	adenocarcinoma	Imaging	Early stage	1955-10-23	62	2015-12-01	2018-03-27	28.2333	IB1		Grade 2	Surgery	No		Yes	Chemotherapy	Chemotherapy	Open surgery	Hysterectomy	No			MRI	Vaginal stump	No	Yes
CC000050	Only within pelvic cavity, solitary lesion	adenocarcinoma	Imaging	Early stage	1977-05-10	35	2011-06-01	2012-03-20	9.76667	IB1		Grade 2	Surgery	No		No			Open surgery	RT	Yes			PET-CT	Parametrium	Yes	No
CC000046	Only within pelvic cavity, solitary lesion	adenocarcinoma	Imaging	Early stage	1970-7--6	42	2011-06-01	2012-02-24	8.93333	IB1		Grade 1	Surgery	No		No			Open surgery	RH	No			sonography ultrosound	Levator ani muscle	No	Yes
CC000073	Only within pelvic cavity, solitary lesion	squamous cell carcinoma	Imaging	Early stage	1953-05-18	64	2015-09-01	2017-07-06	22.4667	IB1		Grade 2	Surgery	No		No			laparoscopy	RH	No			sonography ultrosound	Vaginal stump	Yes	Yes
CC000098	Only within pelvic cavity, solitary lesion	adenocarcinoma	Imaging	Early stage	1976-08-30	40	2013-06-01	2015-05-09	23.5667	IB1		Grade 1	Surgery	No		No			laparoscopy	RH	Yes			sonography ultrosound	Ovary	Yes	Yes
CC000043	Only within pelvic cavity, solitary lesion	squamous cell carcinoma	Serum biomarker	Early stage	1980-11-29	36	2016-06-06	2017-02-09	8.26667	IB1		Grade 3	Surgery	No		No			Open surgery	RH	Yes		SCCAg		Vaginal stump	No	Yes
CC000035	Only within pelvic cavity, solitary lesion	squamous cell carcinoma	Symptoms	Early stage	1965-08-06	48	2013-12-01	2014-05-01	5.03333	IB1		Grade 2	Surgery	No		Yes	Chemotherapy	Chemotherapy	laparoscopy	RH	No	vaginal bleeding			Vaginal stump	No	No
CC000040	Only within pelvic cavity, solitary lesion	squamous cell carcinoma	Symptoms	Early stage	1945-08-23	68	2011-10-26	2012-05-31	7.26667	IB1		Grade 1	Surgery	No		No			Open surgery	RH	No	vaginal bleeding			Vaginal stump	No	Yes
CC000041	Only within pelvic cavity, solitary lesion	squamous cell carcinoma	Symptoms	Early stage	1963-03-11	55	2017-10-11	2018-06-01	7.76667	IB1			Surgery	No		No			laparoscopy	RH	No	vaginal bleeding			Vaginal stump	No	Yes
CC000048	Only within pelvic cavity, solitary lesion	squamous cell carcinoma	Symptoms	Early stage	1956-08-07	56	2009-01-01	2009-10-01	9.1	IB1		Grade 3	Surgery	No		Yes	CCRT	Radiotherapy	Open surgery	RT	Yes	abnormal defecation (dysdefecation)			Rectum	No	No
CC000063	Only within pelvic cavity, solitary lesion	squamous cell carcinoma	Symptoms	Early stage	1975-05-30	39	2013-01-01	2014-06-01	17.2	IB1		Grade 2	Surgery	No		Yes	Radiotherapy	Radiotherapy	Open surgery	RH	Yes	vaginal bleeding			Vaginal stump	No	Yes
CC000064	Only within pelvic cavity, solitary lesion	squamous cell carcinoma	Symptoms	Early stage	1982-7--7	32	2013-06-01	2014-11-01	17.2667	IB1			Surgery	No		No			Open surgery	RH	Yes	vaginal bleeding			Vaginal stump	No	No
CC000031	Only within pelvic cavity, solitary lesion	squamous cell carcinoma	Symptoms	Early stage	1980-05-09	35	2013-12-01	2015-07-01	19.2333	IB1			Surgery	No		No			Open surgery	Hysterectomy	Yes	contact vaginal bleeding			Vaginal stump	No	Yes
CC000085	Only within pelvic cavity, solitary lesion	squamous cell carcinoma	Symptoms	Early stage	1955-06-02	62	2015-09-01	2018-03-01	30.4	IB1			Surgery	No		Yes	Radiotherapy	Radiotherapy	Open surgery	RH	No	vaginal bleeding			Vaginal stump	No	No
CC000089	Only within pelvic cavity, solitary lesion	squamous cell carcinoma	Symptoms	Early stage	1978-08-20	39	2015-03-01	2018-06-01	39.6	IB1		Grade 3	Surgery	No		Yes	Chemotherapy	Chemotherapy	Open surgery	Hysterectomy	Yes	vaginal bleeding			Vaginal stump	Yes	Yes
CC000097	Only within pelvic cavity, solitary lesion	adenocarcinoma	Physical examination	Early stage	1970-05-09	45	2014-06-24	2015-06-01	11.4	IB1		Grade 2	Surgery	No		Yes	Chemotherapy	Chemotherapy	Open surgery	RH	No				Vaginal stump	No	Yes
CC000069	Only within pelvic cavity, solitary lesion	squamous cell carcinoma	Physical examination	Early stage	1975-10-25	42	2013-09-01	2015-03-30	19.1667	IB1			Surgery	No		Yes	Chemotherapy plus radiotherapy	Radiotherapy plus chemotherapy	Open surgery	RH	No				Vaginal stump	No	Yes
CC000090	Only within pelvic cavity, solitary lesion	squamous cell carcinoma	Physical examination	Early stage	1966-09-11	51	2014-04-01	2017-10-12	43	IB1		Grade 2	Surgery	No		No			laparoscopy	RH	No				Vagina	No	No
CC000111	Only within pelvic cavity, solitary lesion	squamous cell carcinoma	Symptoms	LACC	1976-09-16	42	2018-04-01	2018-10-16	6.6	IB2			Surgery	No		Yes	Chemotherapy plus CCRT	Radiotherapy plus chemotherapy	Open surgery	RH	No	abdominal distention			Vaginal stump	No	Yes
CC000148	Only within pelvic cavity, solitary lesion	squamous cell carcinoma	Symptoms	LACC	1974-11-10	43	2016-02-01	2017-10-02	20.3	IIA		Grade 3	Surgery	No		No			Open surgery	RH	No	vaginal bleeding			Vagina	No	Yes
CC000146	Only within pelvic cavity, solitary lesion	adenocarcinoma	Physical examination	LACC	1974-05-14	38	2009-02-17	2010-07-20	17.2667	IIA		Grade 2	Surgery	No		Yes	Chemotherapy plus radiotherapy	Radiotherapy plus chemotherapy	laparoscopy	RH	No				Vaginal stump	Yes	Yes
CC000157	Only within pelvic cavity, solitary lesion	squamous cell carcinoma	Symptoms	LACC	1967-10-09	50	2016-12-28	2018-01-01	12.3	IIA1		Grade 2	Surgery	No		No			laparoscopy	RH	No	contact vaginal bleeding			Vaginal stump	No	No
CC000158	Only within pelvic cavity, solitary lesion	squamous cell carcinoma	Symptoms	LACC	1950-02-28	67	2015-03-01	2017-05-01	26.4	IIA1			Surgery	No		No			laparoscopy	RH	No	vaginal bleeding			Vaginal stump	No	No
CC000159	Only within pelvic cavity, solitary lesion	squamous cell carcinoma	Symptoms	LACC	1967-11-08	50	2017-12-01	2018-06-13	6.46667	IIA2			Only CCRT	No		No						vaginal bleeding			Vagina	No	No
CC000163	Only within pelvic cavity, solitary lesion	squamous cell carcinoma	Symptoms	LACC	1945-11-15	69	2014-07-01	2015-06-01	11.1667	IIA2		Grade 3	Surgery	No		Yes	Chemotherapy plus radiotherapy	Radiotherapy plus chemotherapy	Open surgery	RH	No	lower extremity pain			Vaginal stump	No	No
CC000164	Only within pelvic cavity, solitary lesion	squamous cell carcinoma	Symptoms	LACC	1981-06-06	34	2013-09-01	2015-01-01	16.2333	IIA2		Grade 3	Surgery	No		Yes	Chemotherapy	Chemotherapy	Open surgery	RH	Yes	abdominal pain			Ovary	No	Yes
CC000192	Only within pelvic cavity, solitary lesion	squamous cell carcinoma	Physical examination	LACC	1951-03-27	66	2016-09-01	2017-06-26	9.93333	IIB		Grade 3	Only CCRT	No		No									Urethra	No	No
CC000169	Only within pelvic cavity, solitary lesion	squamous cell carcinoma	Serum biomarker	LACC	1957-10-29	57	2014-03-06	2015-04-08	13.2667	IIB		Grade 2	Only CCRT	No		No							SCCAg		Corpus uteri	No	No
CC000181	Only within pelvic cavity, solitary lesion	squamous cell carcinoma	Symptoms	LACC	1976-06-25	37	2012-08-01	2013-04-01	8.1	IIB			Chemotherapy plus radiotherapy	No		No						vaginal bleeding			Vaginal stump	No	Yes
CC000024	Only beyond pelvic cavity, multiply lesions	Adenosquamous carcinoma	Symptoms	Early stage	1964-10-04	50	2015-01-01	2015-07-01	6.03333	IA2			Surgery	No		No			Open surgery	Hysterectomy	Yes	abdominal distention			Hepatic capsule, Falciform ligament, Perisplenic, Omentum majus, Peritoneal peritoneum	No	Yes
CC000044	Only beyond pelvic cavity, multiply lesions	squamous cell carcinoma	Imaging	Early stage	1959-11-21	57	2016-12-12	2017-08-23	8.46667	IB1		Grade 2	Surgery	No		Yes	Radiotherapy	Radiotherapy	laparoscopy	RH	No			PET-CT	Left supraclavicular lymph node, Para-aortic lymph nodes	No	Yes
CC000076	Only beyond pelvic cavity, multiply lesions	adenocarcinoma	Imaging	Early stage	1960-12-17	56	2015-07-02	2017-07-03	24.4	IB1		Grade 2	Only CCRT	No		No								X-ray	Lung	No	Yes
CC000061	Only beyond pelvic cavity, multiply lesions	squamous cell carcinoma	Symptoms	Early stage	1972-03-24	42	2013-07-01	2014-10-01	15.2333	IB1		Grade 2	Surgery	No		Yes	CCRT	Radiotherapy	laparoscopy	RH	Yes	abdominal pain			Ileum, Mesentery, Peritoneal peritoneum, Abdominal wall	No	No
CC000080	Only beyond pelvic cavity, multiply lesions	squamous cell carcinoma	Symptoms	Early stage	1962-04-28	51	2011-01-01	2013-02-01	25.4	IB1		Grade 2	Surgery	No		Yes	CCRT	Radiotherapy	Open surgery	RH	No	chest pain			Lung, Pleura	No	Yes
CC000082	Only beyond pelvic cavity, multiply lesions	squamous cell carcinoma	Symptoms	Early stage	1953-09-21	59	2009-01-14	2011-04-10	27.2	IB1		Grade 3	Surgery	No		Yes	CCRT	Radiotherapy	Open surgery	RH	No	cough, shortness of breath			Lung, mediastinum, Pulmonary hilum, Pleura	No	No
CC000087	Only beyond pelvic cavity, multiply lesions	squamous cell carcinoma	Symptoms	Early stage	1982-04-06	35	2014-06-26	2017-05-01	34.6667	IB1		Grade 3	Surgery	No		No			Open surgery	RT	Yes	backache			Lumbar vertebra, Para-aortic lymph nodes	No	Yes
CC000265	Only beyond pelvic cavity, multiply lesions	squamous cell carcinoma	Symptoms	Early stage	1977-12-04	36	2010-05-01	2013-04-01	35.5333	IB1		Grade 3	Surgery	No		No			Open surgery	RH	Yes	backache			Para-aortic lymph nodes, Psoas major muscle	No	No
CC000124	Only beyond pelvic cavity, multiply lesions	squamous cell carcinoma	Imaging	LACC	1979-08-01	37	2015-03-02	2016-09-19	18.9	IB2		Grade 2	Surgery	No		Yes	CCRT	Radiotherapy	laparoscopy	RH	Yes			CT	mediastinum	No	Yes
CC000134	Only beyond pelvic cavity, multiply lesions	squamous cell carcinoma	Physical examination	LACC	1943-12-17	70	2010-02-01	2013-02-28	37.4333	IB2		Grade 3	Surgery	No		Yes	CCRT	Radiotherapy	Open surgery	RH	No				Para-aortic lymph nodes, mediastinum, Left supraclavicular lymph node	No	No
CC000144	Only beyond pelvic cavity, multiply lesions	squamous cell carcinoma	Imaging	LACC	1956-7--23	59	2014-08-15	2015-12-02	15.8	IIA			Only CCRT	No		No								X-ray	Lung	No	Yes
CC000160	Only beyond pelvic cavity, multiply lesions	adenocarcinoma	Physical examination	LACC	1975-05-30	39	2014-01-01	2014-10-01	9.1	IIA2		Grade 2	Surgery	No		Yes	CCRT	Radiotherapy	Open surgery	Hysterectomy	No				inguinal lymph nodes, Abdominal wall	Yes	No
CC000232	Only beyond pelvic cavity, multiply lesions	squamous cell carcinoma	Imaging	LACC	1960-09-12	54	2008-11-14	2014-08-09	69.8	IIB		Grade 3	Surgery	No		Yes	CCRT	Radiotherapy	Open surgery	RH	No			CT	Lung	Yes	Yes
CC000195	Only beyond pelvic cavity, multiply lesions	squamous cell carcinoma	Imaging	LACC	1968-7--2	48	2015-09-01	2016-08-12	11.5333	IIB		Grade 2	Only CCRT	No		No								CT	Psoas major muscle	No	Yes
CC000203	Only beyond pelvic cavity, multiply lesions	squamous cell carcinoma	Imaging	LACC	1964-03-25	53	2016-06-23	2017-09-17	15.0333	IIB		Grade 3	Only CCRT	No		No								CT	Lung	No	Yes
CC000213	Only beyond pelvic cavity, multiply lesions	squamous cell carcinoma	Imaging	LACC	1969-05-04	48	2015-04-27	2016-09-27	17.3	IIB		Grade 3	Only CCRT	No		No								CT	Lung	No	Yes
CC000180	Only beyond pelvic cavity, multiply lesions	squamous cell carcinoma	Imaging	LACC	1983-10-16	33	2016-10-01	2017-05-31	8.06667	IIB			Only CCRT	No		No								PET-CT	Right supraclavicular lymph node, Right subclavian lymph node, mediastinum	No	Yes
CC000167	Only beyond pelvic cavity, multiply lesions	squamous cell carcinoma	Symptoms	LACC	1973-04-10	43	2015-11-01	2016-03-09	4.3	IIB		Grade 3	Only CCRT	No		No						Upper extremity sensory abnormality, ptosis			Lung, mediastinum, Rib ribs	No	No
CC000178	Only beyond pelvic cavity, multiply lesions	squamous cell carcinoma	Symptoms	LACC	1964-06-09	51	2014-06-01	2015-01-09	7.4	IIB		Grade 3	Only CCRT	No		No						abdominal pain			Para-aortic lymph nodes	No	Yes
CC000199	Only beyond pelvic cavity, multiply lesions	squamous cell carcinoma	Symptoms	LACC	1957-01-16	61	2017-06-12	2018-08-01	13.8333	IIB		Grade 2	Only CCRT	No		No						chest pain, shortness of breath, cough			Lung	Yes	No
CC000172	Only beyond pelvic cavity, multiply lesions	squamous cell carcinoma	Serum biomarker	LACC	1958-01-16	59	2016-10-01	2017-03-01	5.03333	IIB			Only CCRT	No		No							SCCAg		Lung	No	No
CC000186	Only beyond pelvic cavity, multiply lesions	squamous cell carcinoma	Serum biomarker	LACC	1968-11-01	49	2017-04-06	2017-12-27	8.83333	IIB		Grade 2	Only CCRT	No		No							SCCAg		Lung, mediastinum, Pulmonary hilum	No	No
CC000187	Only beyond pelvic cavity, multiply lesions	squamous cell carcinoma	Serum biomarker	LACC	1966-12-07	51	2017-02-01	2017-10-30	9.03333	IIB			Only CCRT	No		No							SCCAg		Left supraclavicular lymph node, Paraaortic lymph nodes, Esophagus, Para-aortic lymph nodes	Yes	No
CC000221	Only beyond pelvic cavity, multiply lesions	squamous cell carcinoma	Serum biomarker	LACC	1963-05-08	54	2012-08-01	2014-12-15	28.8667	IIB			Only CCRT	No		No							SCCAg		Peritoneal peritoneum, Left supraclavicular lymph node	No	No
CC000211	Only beyond pelvic cavity, multiply lesions	squamous cell carcinoma	Imaging	LACC	1968-12-09	46	2012-05-03	2013-09-29	17.1333	IIB			Chemotherapy plus CCRT	No		No								PET-CT	Para-aortic lymph nodes, Diaphragm, mediastinum	No	Yes
CC000245	Only beyond pelvic cavity, multiply lesions	Adenosquamous carcinoma	Serum biomarker	Advanced stage	1961-06-16	54	2014-07-01	2015-06-15	11.6333	IIIB			Chemotherapy plus CCRT	No		No							CA125		Right subclavian lymph node, mediastinum, Liver	Yes	Yes
CC000250	Only beyond pelvic cavity, multiply lesions	adenocarcinoma	Symptoms	Advanced stage	1958-09-28	59	2014-04-01	2017-06-01	38.5667	IIIB		Grade 1	Only CCRT	No		Yes	Chemotherapy	Chemotherapy				cough			Lung	No	No
CC000244	Only beyond pelvic cavity, multiply lesions	squamous cell carcinoma	Imaging	Advanced stage	1980-02-19	37	2016-11-01	2017-08-01	9.1	IIIB		Grade 2	Only CCRT	No		No								PET-CT	mediastinum, Pulmonary hilum	No	No
CC000248	Only beyond pelvic cavity, multiply lesions	squamous cell carcinoma	Imaging	Advanced stage	1956-05-03	62	2015-12-24	2018-07-03	30.7333	IIIB			Only CCRT	No		No								PET-CT	mediastinum, Pulmonary hilum	No	No
CC000256	Only beyond pelvic cavity, multiply lesions	squamous cell carcinoma	Serum biomarker	Advanced stage	1986-04-17	32	2016-11-14	2018-06-13	19.2	IVA	rectum	Grade 3	Chemotherapy plus CCRT	No		No							SCCAg		mediastinum, Lung	No	Yes
CC000023	Only beyond pelvic cavity, solitary lesion	squamous cell carcinoma	Physical examination	Early stage	1968-08-20	47	2001-05-01	2015-09-01	174.533	IA2			Surgery	No		No			Open surgery	Hysterectomy	Yes				Left supraclavicular lymph node	No	Yes
CC000084	Only beyond pelvic cavity, solitary lesion	squamous cell carcinoma	Imaging	Early stage	1977-04-02	41	2016-03-01	2018-06-01	27.4	IB1			Surgery	No		No			Open surgery	RH	Yes			CT	Psoas major muscle	No	Yes
CC000162	Only beyond pelvic cavity, solitary lesion	squamous cell carcinoma	Physical examination	LACC	1952-10-12	64	2015-12-10	2016-10-27	11.0333	IIA2			Only CCRT	No		No									Right supraclavicular lymph node	No	No
CC000219	Only beyond pelvic cavity, solitary lesion	squamous cell carcinoma	Serum biomarker	LACC	1956-11-14	58	2011-12-01	2013-12-01	24.3667	IIB			Surgery	No		Yes	Chemotherapy plus radiotherapy	Radiotherapy plus chemotherapy	Open surgery	RH	No		SCCAg		Thoracic duct	Yes	Yes
CC000215	Only beyond pelvic cavity, solitary lesion	squamous cell carcinoma	Imaging	LACC	1938-11-20	78	2015-06-01	2017-02-07	20.5667	IIB		Grade 3	Only CCRT	No		No								sonography ultrosound	Liver	Yes	No
CC000231	Only beyond pelvic cavity, solitary lesion	squamous cell carcinoma	Physical examination	LACC	1965-02-15	52	2011-10-10	2017-05-01	67.6667	IIB			Only CCRT	No		No									Right cervical lymph node	Yes	Yes
CC000230	Only beyond pelvic cavity, solitary lesion	squamous cell carcinoma	Symptoms	LACC	1975-01-05	42	2012-07-08	2016-08-12	49.8667	IIB			Only CCRT	No		No						cough			Lung	Yes	Yes
CC000210	Only beyond pelvic cavity, solitary lesion	squamous cell carcinoma	Symptoms	LACC	1968-7--25	48	2015-01-06	2016-06-01	17.0667	IIB			Surgery	No		Yes	CCRT	Radiotherapy	Open surgery	RH	No	neck mass			Left supraclavicular lymph node	No	No
CC000247	Only beyond pelvic cavity, solitary lesion	squamous cell carcinoma	Serum biomarker	Advanced stage	1962-05-20	55	2016-08-01	2017-10-09	14.4667	IIIB			Only CCRT	No		No							SCCAg		Left supraclavicular lymph node	No	No
CC000008	Both within and beyond pelvic cavity	squamous cell carcinoma	Symptoms	Early stage	1968-08-20	49	2016-12-01	2018-06-01	18.2333	IA1		Grade 2	Surgery	No		No			laparoscopy	RH	No	abdominal pain			Vaginal stump, Iliac lymph nodes, inguinal lymph nodes	No	Yes
CC000009	Both within and beyond pelvic cavity	squamous cell carcinoma	Symptoms	Early stage	1970-09-06	47	2016-05-01	2018-03-01	22.3	IA1			Surgery	No		No			Open surgery	Hysterectomy	No	abdominal pain, lower extremity pain			Iliac lymph nodes, Psoas major muscle	No	No
CC000021	Both within and beyond pelvic cavity	squamous cell carcinoma	Symptoms	Early stage	1960-05-16	57	2015-06-01	2018-02-01	32.5333	IA1		Grade 2	Surgery	No		No			transvaginal	Cone	Yes	vaginal bleeding			Uterine cervix, Lung, Corpus uteri	No	Yes
CC000020	Both within and beyond pelvic cavity	squamous cell carcinoma	Symptoms	Early stage	1970-7--5	47	2009-04-08	2017-12-01	105.3	IA1			Surgery	No		No			Open surgery	RH	No	abdominal pain, lower extremity pain			Right subclavian lymph node, Left subclavian lymph nodemediastinum, Pulmonary hilum, Para-aortic lymph nodes, Iliac lymph nodes, Pelvic wall, Obturator internal muscle	No	Yes
CC000269	Both within and beyond pelvic cavity	squamous cell carcinoma	Symptoms	Early stage	1977-05-22	36	2005-12-21	2008-01-01	24.7	IA2			Surgery	No		No			laparoscopy plus transvaginal	RT	Yes	vaginal bleeding			Uterine cervix, Left supraclavicular lymph node	No	Yes
CC000027	Both within and beyond pelvic cavity	squamous cell carcinoma	Imaging	Early stage	1953-04-10	63	2014-03-01	2015-06-01	15.2333	IB1		Grade 3	Surgery	No		Yes	Chemotherapy	Chemotherapy	Open surgery	RH	No			MRI	Pubis	Yes	Yes
CC000030	Both within and beyond pelvic cavity	squamous cell carcinoma	Symptoms	Early stage	1965-08-21	47	2004-06-01	2012-03-09	94.6	IB1			Surgery	No		No			Open surgery	RH	Yes	lower extremity pain			Pelvic cavity, Abdominal cavity, Sacrum, Pelvic wall	No	No
CC000029	Both within and beyond pelvic cavity	squamous cell carcinoma	Physical examination	Early stage	1951-10-09	63	2012-08-01	2014-04-01	20.2667	IB1		Grade 3	Surgery	No		Yes	Chemotherapy plus radiotherapy	Radiotherapy plus chemotherapy	Open surgery	RH	No				Rib ribs, Humerus, Femur	No	Yes
CC000051	Both within and beyond pelvic cavity	squamous cell carcinoma	Imaging	Early stage	1964-04-01	53	2017-02-01	2017-12-02	10.1333	IB1		Grade 3	Surgery	No		Yes	Chemotherapy plus radiotherapy	Radiotherapy plus chemotherapy	laparoscopy	RH	No			CT	Lung, Vagina, Rectum, Psoas major muscle	No	Yes
CC000038	Both within and beyond pelvic cavity	adenocarcinoma	Imaging	Early stage	1981-05-03	35	2015-04-01	2015-11-02	7.16667	IB1		Grade 3	Surgery	No		No			laparoscopy	RH	No			PET-CT	Pelvic cavity, inguinal lymph nodes	No	Yes
CC000059	Both within and beyond pelvic cavity	adenocarcinoma	Imaging	Early stage	1981-04-02	34	2014-04-17	2015-04-22	12.3333	IB1		Grade 1	Surgery	No		No			laparoscopy plus transvaginal	RT	Yes			PET-CT	Uterine cervix, Pelvic cavity, Left supraclavicular lymph node, Left cervical lymph node	No	Yes
CC000100	Both within and beyond pelvic cavity	squamous cell carcinoma	Imaging	Early stage	1972-10-28	45	2016-10-01	2018-01-01	15.2333	IB1			Surgery	No		Yes	CCRT	Radiotherapy	laparoscopy	RH	No			sonography ultrosound	Iliac lymph nodes, Para-aortic lymph nodes	No	No
CC000074	Both within and beyond pelvic cavity	Adenosquamous carcinoma	Imaging	Early stage	1963-12-12	49	2010-09-14	2012-08-08	23.1333	IB1		Grade 3	Surgery	No		Yes	CCRT	Radiotherapy	Open surgery	RH	Yes			sonography ultrosound	Omentum majus, Pelvic wall, Ureter, Ileum	Yes	Yes
CC000078	Both within and beyond pelvic cavity	adenocarcinoma	Imaging	Early stage	1976-05-15	41	2015-07-19	2017-08-16	25.3	IB1		Grade 1	Surgery	No		No			laparoscopy	RH	No			sonography ultrosound	Iliac lymph nodes, Hepatic capsule	No	No
CC000091	Both within and beyond pelvic cavity	adenocarcinoma	Imaging	Early stage	1980-12-27	36	2012-04-01	2016-12-12	57.2	IB1		Grade 3	Surgery	No		Yes	CCRT	Radiotherapy	Open surgery	RH	No			sonography ultrosound	Lung, Pelvic wall, Vaginal stump	No	Yes
CC000032	Both within and beyond pelvic cavity	squamous cell carcinoma	Imaging	Early stage	1957-09-04	59	2010-05-01	2016-05-01	73.0667	IB1			Surgery	No		No			Open surgery	Hysterectomy	No			sonography ultrosound	Pelvic cavity, Ureter, mediastinum, Pulmonary hilum, Vagina	No	No
CC000066	Both within and beyond pelvic cavity	squamous cell carcinoma	Imaging	Early stage	1975-11-04	39	2012-06-04	2013-12-01	18.1667	IB1		Grade 2	Surgery	No		Yes	Radiotherapy	Radiotherapy	laparoscopy	RH	Yes			X-ray	Lung, Iliac lymph nodes, mediastinum	No	Yes
CC000045	Both within and beyond pelvic cavity	squamous cell carcinoma	Serum biomarker	Early stage	1976-12-03	40	2013-09-13	2014-06-01	8.7	IB1			Surgery	No		Yes	Radiotherapy	Radiotherapy	Open surgery	RH	No		SCCAg		Iliac lymph nodes, Para-aortic lymph nodes	No	Yes
CC000053	Both within and beyond pelvic cavity	adenocarcinoma	Serum biomarker	Early stage	1966-12-01	51	2017-08-01	2018-06-25	10.9333	IB1		Grade 1	Surgery	No		Yes	CCRT	Radiotherapy	laparoscopy	RH	No		CA19-9		Iliac lymph nodes, Omentum majus, Pelvic peritoneum, Peritoneal peritoneum, Intestine (multiple), Appendix	No	Yes
CC000062	Both within and beyond pelvic cavity	squamous cell carcinoma	Serum biomarker	Early stage	1971-05-25	44	2013-12-01	2015-04-01	16.2	IB1		Grade 3	Surgery	No		No			laparoscopy	RH	Yes		SCCAg		Rectum, Sigmoid colon, Ureter, Descending colon, Pelvic wall	No	Yes
CC000039	Both within and beyond pelvic cavity	adenocarcinoma	Symptoms	Early stage	1986-05-14	30	2016-08-01	2017-03-06	7.23333	IB1		Grade 2	Surgery	No		Yes	CCRT	Radiotherapy	laparoscopy	RH	Yes	abnormal defecation (diarrhea)			Ovary, Descending colon	No	No
CC000042	Both within and beyond pelvic cavity	squamous cell carcinoma	Symptoms	Early stage	1964-05-15	52	2016-04-01	2016-11-30	8.1	IB1		Grade 2	Surgery	No		Yes	CCRT	Radiotherapy	laparoscopy	RH	No	Abnormal urination (dysuria), abnormal defecation (alternation of diarrhea and constipation)			Vaginal stump, Pelvic wall, Ureter, Iliac lymph nodes, Para-aortic lymph nodes	Yes	Yes
CC000052	Both within and beyond pelvic cavity	squamous cell carcinoma	Symptoms	Early stage	1982-03-10	33	2014-10-14	2015-09-01	10.7333	IB1		Grade 2	Surgery	No		No			laparoscopy	RH	Yes	abdominal pain			Ureter, Iliac lymph nodes, Para-aortic lymph nodes, Rectum, inguinal lymph nodes	Yes	Yes
CC000099	Both within and beyond pelvic cavity	adenocarcinoma	Symptoms	Early stage	1953-04-21	59	2011-10-01	2012-09-01	11.2	IB1			Surgery	No		Yes	CCRT	Radiotherapy	Open surgery	RH	No	abdominal distention, abnormal defecation (constipation)			Levator ani muscle, Intestine (multiple)	Yes	Yes
CC000067	Both within and beyond pelvic cavity	squamous cell carcinoma	Symptoms	Early stage	1984-03-04	33	2016-02-01	2017-08-01	18.2333	IB1		Grade 3	Surgery	No		Yes	Chemotherapy plus radiotherapy	Radiotherapy plus chemotherapy	laparoscopy	RH	Yes	vaginal discharge			Vagina, Vaginal stump, inguinal lymph nodes	Yes	Yes
CC000070	Both within and beyond pelvic cavity	adenocarcinoma	Symptoms	Early stage	1969-10-10	48	2015-10-08	2017-05-31	20.0333	IB1		Grade 2	Surgery	No		Yes	CCRT	Radiotherapy	laparoscopy	RH	No	vaginal discharge			Vaginal stump, Abdominal cavity, Rectum	Yes	Yes
CC000077	Both within and beyond pelvic cavity	squamous cell carcinoma	Symptoms	Early stage	1957-11-06	59	2015-04-01	2017-04-09	24.6333	IB1		Grade 2	Surgery	No		Yes	CCRT	Radiotherapy	laparoscopy	RH	No	abdominal pain			Rectum, Hepatic capsule, Peritoneal peritoneum, Intestine (multiple)	Yes	Yes
CC000271	Both within and beyond pelvic cavity	adenocarcinoma	Symptoms	Early stage	1968-09-07	45	2010-05-01	2012-11-01	30.5	IB1			Chemotherapy plus CCRT	No		No						abdominal pain, swelling of lower extremity			Ovary, Corpus uteri, Iliac lymph nodes, Rectum, Sigmoid colon	Yes	Yes
CC000102	Both within and beyond pelvic cavity	adenocarcinoma	Symptoms	Early stage	1974-08-01	40	2011-05-01	2014-04-01	35.5333	IB1		Grade 1	Surgery	No		Yes	Chemotherapy	Chemotherapy	Open surgery	RH	No	Dysuria (hematuria)			Lung, Bladder, Vaginal stump，Iliac lymph nodes, Para-aortic lymph nodes	Yes	Yes
CC000092	Both within and beyond pelvic cavity	squamous cell carcinoma	Symptoms	Early stage	1956-03-22	57	2008-05-13	2013-08-05	63.6667	IB1			Surgery	No		No			laparoscopy	RH	No	abdominal distention			Psoas major muscle, Iliac lymph nodes, Para-aortic lymph nodes	Yes	Yes
CC000095	Both within and beyond pelvic cavity	adenocarcinoma	Symptoms	Early stage	1970-05-05	48	2009-05-01	2018-06-01	110.6	IB1		Grade 1	Surgery	No		Yes	Chemotherapy	Chemotherapy	Open surgery	RH	No	abdominal pain			Liver, Hepatic capsule, Pelvic cavity, Pelvic peritoneum, Abdominal cavity, Peritoneal peritoneum, Diaphragm, Porta hepatis, Iliac lymph nodes, Para-aortic lymph nodes, Abdominal wall	No	Yes
CC000130	Both within and beyond pelvic cavity	adenocarcinoma	Imaging	LACC	1974-05-18	43	2015-06-16	2017-10-27	28.8	IB2		Grade 1	Surgery	No		Yes	Chemotherapy plus CCRT	Radiotherapy plus chemotherapy	laparoscopy	RH	No			PET-CT	Pelvic wall, inguinal lymph nodes, Ureter, Rectum	No	Yes
CC000108	Both within and beyond pelvic cavity	squamous cell carcinoma	Imaging	LACC	1973-04-02	41	2013-08-01	2014-01-24	5.86667	IB2		Grade 2	Surgery	No		Yes	Radiotherapy	Radiotherapy	laparoscopy	RH	Yes			sonography ultrosound	Lung, Pelvic wall	No	No
CC000122	Both within and beyond pelvic cavity	squamous cell carcinoma	Serum biomarker	LACC	1970-11-16	44	2013-11-01	2015-03-23	16.9	IB2		Grade 2	Surgery	No		No			laparoscopy	RH	Yes		SCCAg		Vaginal stump，Para-aortic lymph nodes, Iliac lymph nodes, inguinal lymph nodes	No	Yes
CC000127	Both within and beyond pelvic cavity	squamous cell carcinoma	Serum biomarker	LACC	1971-12-28	46	2016-07-15	2018-06-12	23.2333	IB2		Grade 2	Only CCRT	No		No							SCCAg		Iliac lymph nodes, Para-aortic lymph nodes	No	No
CC000260	Both within and beyond pelvic cavity	squamous cell carcinoma	Symptoms	LACC	1963-11-09	54	2012-08-01	2018-04-01	68.9667	IB2			Surgery	No		Yes	Chemotherapy plus CCRT	Radiotherapy plus chemotherapy	Open surgery	RH	No	abdominal pain			Hip bone	No	Yes
CC000141	Both within and beyond pelvic cavity	squamous cell carcinoma	Symptoms	LACC	1964-09-10	53	2017-08-29	2018-02-15	5.66667	IIA		Grade 2	Surgery	No		Yes	Chemotherapy	Chemotherapy	Open surgery	RH	No	abdominal pain			Pelvic wall, Ureter	No	No
CC000140	Both within and beyond pelvic cavity	squamous cell carcinoma	Symptoms	LACC	1961-06-26	51	2007-06-08	2012-05-01	59.6333	IIA		Grade 3	Surgery	No		No			Open surgery	RH	No	backache			Vagina, Lumbar vertebra, Iliac lymph nodes, Para-aortic lymph nodes, Para-aortic lymph nodes	No	No
CC000261	Both within and beyond pelvic cavity	squamous cell carcinoma	Symptoms	LACC	1974-05-01	43	2011-04-01	2017-08-01	77.1333	IIA1			Surgery	No		No			Open surgery	Hysterectomy	Yes	vaginal bleeding			Vaginal stump, Bladder, inguinal lymph nodes, Iliac lymph nodes	No	Yes
CC000267	Both within and beyond pelvic cavity	squamous cell carcinoma	Imaging	LACC	1968-01-14	48	2013-01-10	2016-03-28	39.1	IIA2		Grade 1	Surgery	No		Yes	Chemotherapy plus CCRT	Radiotherapy plus chemotherapy	Open surgery	RH	No			CT	Iliac lymph nodes, Para-aortic lymph nodes, Hepatic capsule	Yes	Yes
CC000161	Both within and beyond pelvic cavity	squamous cell carcinoma	Imaging	LACC	1963-11-10	54	2016-03-29	2017-02-01	10.3	IIA2		Grade 2	Surgery	No		Yes	Chemotherapy plus CCRT	Radiotherapy plus chemotherapy	laparoscopy	RH	No			sonography ultrosound	Pelvic cavity, Ureter, Bladder, Lung	Yes	Yes
CC000166	Both within and beyond pelvic cavity	adenocarcinoma	Imaging	LACC	1977-04-15	40	2013-05-01	2018-01-17	57.4	IIA2		Grade 2	Surgery	No		Yes	CCRT	Radiotherapy	Open surgery	RH	Yes			sonography ultrosound	Ovary, Pleura	Yes	Yes
CC000212	Both within and beyond pelvic cavity	squamous cell carcinoma	Imaging	LACC	1952-08-15	65	2017-02-27	2018-07-27	17.1667	IIB		Grade 2	Chemotherapy plus CCRT	No		No								PET-CT	Corpus uteri, Esophagus, Porta hepatis, Pleura, Hepatic capsule	No	No
CC000179	Both within and beyond pelvic cavity	squamous cell carcinoma	Imaging	LACC	1984-01-24	33	2015-11-08	2016-07-01	7.86667	IIB		Grade 3	Only CCRT	No		No								CT	Uterine cervix, Ureter, Mesentery, Iliac lymph nodes, Para-aortic lymph nodes, inguinal lymph nodes	No	No
CC000204	Both within and beyond pelvic cavity	squamous cell carcinoma	Imaging	LACC	1959-09-12	58	2015-11-16	2017-03-05	15.8333	IIB		Grade 2	Only CCRT	No		No								CT	Iliac lymph nodes, Para-aortic lymph nodes	No	Yes
CC000209	Both within and beyond pelvic cavity	squamous cell carcinoma	Imaging	LACC	1960-11-27	57	2017-03-16	2018-08-03	16.8333	IIB		Grade 3	Only CCRT	No		No								MRI	Corpus uteri, Iliac lymph nodes, Omentum majus, Peritoneal peritoneum	No	Yes
CC000174	Both within and beyond pelvic cavity	squamous cell carcinoma	Physical examination	LACC	1977-04-26	40	2016-11-16	2017-05-12	5.9	IIB		Grade 1	Only CCRT	No		No									Left subclavian lymph node, Left cervical lymph node, Mesentery, Falciform ligament, Iliac lymph nodes, Para-aortic lymph nodes	No	Yes
CC000182	Both within and beyond pelvic cavity	squamous cell carcinoma	Physical examination	LACC	1966-01-17	52	2017-04-01	2017-12-01	8.13333	IIB		Grade 3	Only CCRT	No		No									Right upper limb muscle, Right cervical lymph node, Left cervical lymph node, Left supraclavicular lymph node, Left subclavian lymph node, mediastinum, Pulmonary hilum, Iliac lymph nodes, Para-aortic lymph nodes, Bone metastases (multiple)	No	Yes
CC000227	Both within and beyond pelvic cavity	squamous cell carcinoma	Physical examination	LACC	1966-12-01	51	2014-12-15	2018-04-16	40.6	IIB		Grade 1	Only CCRT	No		No									Rectum, Omentum majus, Pelvic wall	Yes	Yes
CC000173	Both within and beyond pelvic cavity	squamous cell carcinoma	Symptoms	LACC	1979-05-08	38	2016-09-19	2017-03-01	5.43333	IIB			Only CCRT	No		No						abdominal pain			Iliac lymph nodes, Hepatic capsule, Omentum majus	Yes	Yes
CC000176	Both within and beyond pelvic cavity	squamous cell carcinoma	Symptoms	LACC	1971-09-11	46	2017-02-01	2017-09-01	7.06667	IIB			Only CCRT	No		No						Hematochezia			Rectum, Sigmoid colon	No	Yes
CC000222	Both within and beyond pelvic cavity	adenocarcinoma	Symptoms	LACC	1946-05-18	72	2015-09-01	2018-04-01	31.4333	IIB			Chemotherapy plus CCRT	No		No						chest pain			Vagina, Lung, Pleura, Pulmonary hilum, mediastinum, inguinal lymph nodes	No	Yes
CC000196	Both within and beyond pelvic cavity	squamous cell carcinoma	Symptoms	LACC	1963-10-13	54	2016-11-18	2017-11-01	11.6	IIB		Grade 3	Only CCRT	No		No						neck mass			Left supraclavicular lymph node, Para-aortic lymph nodes, Iliac lymph nodes, Sacrum	No	Yes
CC000200	Both within and beyond pelvic cavity	squamous cell carcinoma	Symptoms	LACC	1962-11-24	50	2011-08-01	2012-10-01	14.2333	IIB			Surgery	No		Yes	Radiotherapy	Radiotherapy	laparoscopy	RH	No	abdominal pain			Iliac lymph nodes, Para-aortic lymph nodes	No	Yes
CC000238	Both within and beyond pelvic cavity	squamous cell carcinoma	Symptoms	LACC	1963-06-28	53	2015-07-02	2016-09-19	14.8333	IIB		Grade 3	Surgery	No		Yes	CCRT	Radiotherapy	Open surgery	Hysterectomy	Yes	neck mass			Right supraclavicular lymph node, Left supraclavicular lymph node, Right subclavian lymph node, Left subclavian lymph node, mediastinum, Pulmonary hilum, Lung, Vaginal stump，Bone metastases (multiple)	No	Yes
CC000217	Both within and beyond pelvic cavity	squamous cell carcinoma	Symptoms	LACC	1966-03-21	51	2015-05-01	2017-03-01	22.3333	IIB			Only CCRT	No		No						vaginal bleeding			Uterine cervix, Corpus uteri, Vagina, Bladder, inguinal lymph nodes	Yes	Yes
CC000177	Both within and beyond pelvic cavity	squamous cell carcinoma	Serum biomarker	LACC	1973-04-27	43	2016-01-05	2016-08-08	7.2	IIB			Only CCRT	No		No							SCCAg		Psoas major muscle, Iliac lymph nodes, inguinal lymph nodes, mediastinum, Pulmonary hilum, Uterine cervix	Yes	Yes
CC000183	Both within and beyond pelvic cavity	squamous cell carcinoma	Serum biomarker	LACC	1962-08-06	56	2016-03-01	2016-11-01	8.16667	IIB			Only CCRT	No		No							SCCAg		Corpus uteri, Iliac lymph nodes, Right supraclavicular lymph node, mediastinum, Breast, Diaphragm	Yes	Yes
CC000206	Both within and beyond pelvic cavity	squamous cell carcinoma	Serum biomarker	LACC	1959-03-08	58	2016-07-18	2017-11-09	15.9667	IIB			Only CCRT	No		No							SCCAg		Iliac lymph nodes, Para-aortic lymph nodes, Pulmonary hilum	No	Yes
CC000214	Both within and beyond pelvic cavity	squamous cell carcinoma	Serum biomarker	LACC	1961-7--10	53	2013-10-20	2015-06-01	19.6333	IIB			Only CCRT	No		No							SCCAg		Pelvic cavity, Hepatic capsule, Para-aortic lymph nodes, Iliac lymph nodes	No	Yes
CC000223	Both within and beyond pelvic cavity	squamous cell carcinoma	Serum biomarker	LACC	1969-05-06	46	2011-07-01	2014-03-01	32.4667	IIB			Only CCRT	No		No							SCCAg		Iliac lymph nodes, Para-aortic lymph nodes	No	Yes
CC000241	Both within and beyond pelvic cavity	squamous cell carcinoma	Imaging	Advanced stage	1955-08-25	61	2016-02-14	2017-03-30	13.6667	IIIA		Grade 2	Only CCRT	No		No								CT	Lung, mediastinum, Uterine cervix	Yes	Yes
CC000240	Both within and beyond pelvic cavity	squamous cell carcinoma	Serum biomarker	Advanced stage	1960-09-26	55	2015-03-18	2015-11-09	7.86667	IIIA			Only CCRT	No		No							SCCAg		Iliac lymph nodes, Para-aortic lymph nodes	Yes	Yes
CC000251	Both within and beyond pelvic cavity	adenocarcinoma	Serum biomarker	Advanced stage	1973-01-13	45	2017-12-01	2018-07-07	7.26667	IIIB			Only CCRT	No		No							SCCAg		Uterine cervix, Bladder, Ureter, Vagina, Omentum majus, Mesentery, inguinal lymph nodes	Yes	Yes
CC000252	Both within and beyond pelvic cavity	squamous cell carcinoma	Serum biomarker	Advanced stage	1966-09-20	49	2014-10-01	2016-03-01	17.2333	IIIB			Only CCRT	No		No							SCCAg		Iliac lymph nodes, Para-aortic lymph nodes	Yes	Yes
CC000254	Both within and beyond pelvic cavity	squamous cell carcinoma	Symptoms	Advanced stage	1960-7--8	57	2016-05-21	2017-05-08	11.7333	IVB	left supraclavicular lymph node	Grade 2	Chemotherapy plus radiotherapy	No		No						lower limbs pain, lower limbs swelling			Uterine cervix, Corpus uteri, Vagina, Ureter, Iliac lymph nodes, Para-aortic lymph nodes, Lung, Pulmonary hilum, mediastinum	No	Yes
CC000257	Both within and beyond pelvic cavity	adenocarcinoma	Imaging	Advanced stage	1973-7--9	43	2015-04-09	2016-04-05	12.0667	IVB	omentum majus	Grade 1	Chemotherapy plus CCRT	No		No								CT	Lung, Right supraclavicular lymph node, mediastinum, Corpus uteri	Yes	Yes
CC000120	Only within pelvic cavity, multiply lesions	squamous cell carcinoma	Imaging	LACC	1974-06-07	44	2017-03-01	2018-06-01	15.2333	IB2		Grade 2	Surgery	Yes	Chemotherapy	Yes	CCRT	Radiotherapy	laparoscopy	RH	No			CT	Uterine cervix, Ureter	No	Yes
CC000109	Only within pelvic cavity, multiply lesions	squamous cell carcinoma	Imaging	LACC	1985-05-30	27	2012-01-18	2012-07-18	6.06667	IB2		Grade 3	Surgery	Yes	Chemotherapy	No			laparoscopy	RH	Yes			sonography ultrosound	Bladder, Uterine cervix	No	Yes
CC000113	Only within pelvic cavity, multiply lesions	squamous cell carcinoma	Imaging	LACC	1972-06-25	46	2017-07-24	2018-05-19	9.96667	IB2		Grade 3	Surgery	Yes	Chemotherapy	Yes	Chemotherapy plus radiotherapy	Radiotherapy plus chemotherapy	laparoscopy	RH	No			sonography ultrosound	Vaginal stump, Iliac lymph nodes	No	Yes
CC000126	Only within pelvic cavity, multiply lesions	adenocarcinoma	Imaging	LACC	1964-02-11	50	2012-04-27	2014-03-01	22.4333	IB2		Grade 2	Surgery	Yes	Chemotherapy	Yes	Chemotherapy	Chemotherapy	Open surgery	RH	No			sonography ultrosound	Ureter, Bladder	No	Yes
CC000129	Only within pelvic cavity, multiply lesions	squamous cell carcinoma	Serum biomarker	LACC	1969-10-21	45	2012-09-28	2015-01-23	28.2333	IB2		Grade 3	Surgery	Yes	Chemotherapy	Yes	CCRT	Radiotherapy	Open surgery	RH	Yes		SCCAg		Vaginal stump, Obturator internal muscle, Ureter	Yes	Yes
CC000105	Only within pelvic cavity, multiply lesions	adenocarcinoma	Symptoms	LACC	1979-01-10	37	2015-08-09	2016-01-01	4.83333	IB2		Grade 2	Surgery	Yes	Chemotherapy	Yes	Chemotherapy plus CCRT	Radiotherapy plus chemotherapy	laparoscopy	RH	Yes	vaginal discharge			Bladder, Rectum, Ureter	No	No
CC000136	Only within pelvic cavity, multiply lesions	squamous cell carcinoma	Symptoms	LACC	1958-08-15	54	2012-02-07	2012-07-15	5.3	IB2			Surgery	Yes	Chemotherapy	Yes	Chemotherapy	Chemotherapy	laparoscopy	RH	No	vaginal bleeding			Vagina, Urethra	No	Yes
CC000117	Only within pelvic cavity, multiply lesions	squamous cell carcinoma	Symptoms	LACC	1980-7--16	32	2011-10-01	2012-10-01	12.2	IB2		Grade 2	Surgery	Yes	Chemotherapy	Yes	CCRT	Radiotherapy	laparoscopy	RH	Yes	vaginal bleeding, backache			Vaginal stump, Rectum, Bladder	Yes	No
CC000218	Only within pelvic cavity, multiply lesions	adenocarcinoma	Serum biomarker	LACC	1962-12-10	54	2015-08-01	2017-06-01	22.3333	IIB		Grade 2	Only CCRT	Yes	Chemotherapy	No							CA125		Vaginal stump, Vagina	No	No
CC000197	Only within pelvic cavity, multiply lesions	squamous cell carcinoma	Imaging	LACC	1962-01-12	55	2015-12-09	2016-12-10	12.2333	IIB		Grade 3	Surgery	Yes	Chemotherapy	Yes	Chemotherapy	Chemotherapy	laparoscopy	RH	Yes			MRI	Iliac lymph nodes	No	No
CC000188	Only within pelvic cavity, multiply lesions	squamous cell carcinoma	Imaging	LACC	1979-05-30	38	2016-10-19	2017-07-20	9.13333	IIB			Only CCRT	Yes	Chemotherapy	No								PET-CT	Iliac lymph nodes	No	Yes
CC000190	Only within pelvic cavity, multiply lesions	squamous cell carcinoma	Physical examination	LACC	1953-11-28	60	2012-05-01	2013-02-15	9.66667	IIB			Only CCRT	Yes	Chemotherapy	No									Vagina, Corpus uteri, Parametrium, Rectum	Yes	Yes
CC000216	Only within pelvic cavity, multiply lesions	squamous cell carcinoma	Physical examination	LACC	1969-10-17	44	2012-09-29	2014-06-25	21.1333	IIB		Grade 2	Only CCRT	Yes	Chemotherapy	No									Uterine cervix	No	Yes
CC000079	Only within pelvic cavity, solitary lesion	squamous cell carcinoma	Imaging	Early stage	1979-05-22	38	2015-07-01	2017-08-01	25.4	IB1		Grade 2	Surgery	Yes	Chemotherapy	Yes	Chemotherapy	Chemotherapy	Open surgery	RH	Yes			sonography ultrosound	Ureter	No	Yes
CC000104	Only within pelvic cavity, solitary lesion	squamous cell carcinoma	Symptoms	LACC	1969-10-20	44	2012-02-01	2012-06-09	4.3	IB2			Surgery	Yes	Chemotherapy	No			Open surgery	RH	Yes	vaginal bleeding			Vaginal stump	No	No
CC000135	Only within pelvic cavity, solitary lesion	adenocarcinoma	Symptoms	LACC	1966-05-16	48	2007-11-12	2013-08-05	69.7667	IB2		Grade 1	Surgery	Yes	Chemotherapy	Yes	CCRT	Radiotherapy	Open surgery	RH	No	vaginal bleeding			Vaginal stump	No	Yes
CC000165	Only within pelvic cavity, solitary lesion	squamous cell carcinoma	Physical examination	LACC	1974-10-12	43	2016-07-01	2017-12-22	17.9667	IIA2		Grade 2	Surgery	Yes	Chemotherapy	Yes	CCRT	Radiotherapy	laparoscopy	RH	Yes				Rectum	No	No
CC000229	Only within pelvic cavity, solitary lesion	adenocarcinoma	Serum biomarker	LACC	1957-06-05	56	2009-06-01	2012-11-19	42.2333	IIB			Surgery	Yes	Chemotherapy	No			Open surgery	Hysterectomy	No		CA125		Bladder	No	Yes
CC000233	Only within pelvic cavity, solitary lesion	Adenosquamous carcinoma	Symptoms	LACC	1968-05-04	50	2009-04-10	2018-04-01	109.267	IIB			Surgery	Yes	Chemotherapy	Yes	Chemotherapy plus radiotherapy	Radiotherapy plus chemotherapy	Open surgery	RH	No	vaginal bleeding			Vagina	No	No
CC000201	Only within pelvic cavity, solitary lesion	squamous cell carcinoma	Physical examination	LACC	1974-10-06	41	2014-01-23	2015-04-01	14.4333	IIB		Grade 2	Surgery	Yes	Chemotherapy	Yes	Chemotherapy plus CCRT	Radiotherapy plus chemotherapy	Open surgery	RH	Yes				Vaginal stump	No	No
CC000068	Only beyond pelvic cavity, multiply lesions	squamous cell carcinoma	Imaging	Early stage	1981-03-18	36	2013-05-13	2014-11-14	18.3333	IB1			Surgery	Yes	Chemotherapy	Yes	Chemotherapy	Chemotherapy	Open surgery	RH	Yes			PET-CT	Lung	No	Yes
CC000131	Only beyond pelvic cavity, multiply lesions	squamous cell carcinoma	Serum biomarker	LACC	1957-10-01	59	2014-08-16	2017-03-01	30.9333	IB2		Grade 2	Surgery	Yes	Chemotherapy	Yes	CCRT	Radiotherapy	Open surgery	RH	No		SCCAg		Liver, Hepatic capsule, Diaphragm, Psoas major muscle	No	Yes
CC000133	Only beyond pelvic cavity, multiply lesions	squamous cell carcinoma	Serum biomarker	LACC	1984-7--16	31	2012-08-01	2015-05-12	33.8	IB2		Grade 3	Surgery	Yes	Chemotherapy	Yes	Chemotherapy	Chemotherapy	Open surgery	RH	Yes		SCCAg		Para-aortic lymph nodes	No	Yes
CC000125	Only beyond pelvic cavity, multiply lesions	adenocarcinoma	Symptoms	LACC	1984-08-01	31	2013-04-09	2015-01-09	21.3333	IB2		Grade 2	Surgery	Yes	Chemotherapy	Yes	Chemotherapy plus radiotherapy	Radiotherapy plus chemotherapy	Open surgery	RH	No	backache			Iliac lymph nodes, Para-aortic lymph nodes, Ureter, Psoas major muscle	No	No
CC000145	Only beyond pelvic cavity, multiply lesions	adenocarcinoma	Symptoms	LACC	1978-09-13	35	2011-06-01	2012-10-01	16.2667	IIA		Grade 2	Surgery	Yes	Chemotherapy	Yes	Chemotherapy	Chemotherapy	Open surgery	RH	Yes	abdominal pain, backache, dysuria			Ureter, Bladder	No	No
CC000147	Only beyond pelvic cavity, multiply lesions	squamous cell carcinoma	Symptoms	LACC	1956-03-17	61	2015-11-09	2017-06-01	19.2667	IIA		Grade 2	Surgery	Yes	Chemotherapy	Yes	Chemotherapy plus radiotherapy	Radiotherapy plus chemotherapy	Open surgery	RH	No	Swelling of vulva			Vulva	Yes	Yes
CC000184	Only beyond pelvic cavity, multiply lesions	squamous cell carcinoma	Symptoms	LACC	1963-03-18	52	2015-05-20	2016-02-01	8.56667	IIB		Grade 2	Only CCRT	Yes	Chemotherapy	Yes	Hysterectomy					cough, chest pain			Lung, mediastinum, Pulmonary hilum	No	No
CC000249	Only beyond pelvic cavity, multiply lesions	squamous cell carcinoma	Serum biomarker	Advanced stage	1965-11-15	51	2014-11-01	2017-06-26	32.2667	IIIB		Grade 2	Only radiotherapy	Yes	Chemotherapy	No							SCCAg		Left cervical lymph node, Left supraclavicular lymph node, Para-aortic lymph nodes, Humerus	No	Yes
CC000060	Only beyond pelvic cavity, solitary lesion	squamous cell carcinoma	Imaging	Early stage	1970-12-10	44	2014-04-18	2015-05-28	13.5	IB1			Only CCRT	Yes	Chemotherapy	Yes	Chemotherapy	Chemotherapy						sonography ultrosound	Ascending colon	No	No
CC000128	Both within and beyond pelvic cavity	squamous cell carcinoma	Imaging	LACC	1971-02-19	46	2015-04-14	2017-07-05	27.1	IB2		Grade 2	Surgery	Yes	Chemotherapy	Yes	CCRT	Radiotherapy	laparoscopy	RH	Yes			sonography ultrosound	Iliac lymph nodes, Para-aortic lymph nodes, Lung, Liver, mediastinum, Pulmonary hilum	No	Yes
CC000123	Both within and beyond pelvic cavity	squamous cell carcinoma	Serum biomarker	LACC	1972-05-28	45	2016-06-23	2017-11-21	17.2	IB2		Grade 3	Surgery	Yes	Chemotherapy	Yes	CCRT	Radiotherapy	laparoscopy	RH	No		SCCAg		Vaginal stump, inguinal lymph nodes	No	Yes
CC000263	Both within and beyond pelvic cavity	squamous cell carcinoma	Symptoms	LACC	1968-02-05	47	2014-08-18	2015-05-10	8.83333	IB2			Surgery	Yes	Chemotherapy	Yes	Chemotherapy plus radiotherapy	Radiotherapy plus chemotherapy	Open surgery	RH	No	vaginal discharge			Vagina, inguinal lymph nodes	No	No
CC000264	Both within and beyond pelvic cavity	adenocarcinoma	Symptoms	LACC	1972-11-14	41	2012-05-01	2013-12-18	19.8667	IB2			Surgery	Yes	Chemotherapy plus radiotherapy	Yes	Chemotherapy plus radiotherapy	Radiotherapy plus chemotherapy	Open surgery	Hysterectomy	No	intestinal obstruction			Pelvic peritoneum, Peritoneal peritoneum, Intestine (multiple)	No	Yes
CC000143	Both within and beyond pelvic cavity	Adenosquamous carcinoma	Imaging	LACC	1980-04-12	32	2011-07-01	2012-03-28	9.03333	IIA			Surgery	Yes	Chemotherapy plus radiotherapy	Yes	Chemotherapy plus CCRT	Radiotherapy plus chemotherapy	Open surgery	RH	No			sonography ultrosound	Vaginal stump, Iliac lymph nodes, Para-aortic lymph nodes, inguinal lymph nodes	No	No
CC000142	Both within and beyond pelvic cavity	squamous cell carcinoma	Symptoms	LACC	1976-11-04	38	2014-05-25	2014-12-30	7.3	IIA		Grade 3	Surgery	Yes	Chemotherapy	No			laparoscopy	RH	Yes	vaginal bleeding			Vaginal stump, Para-aortic lymph nodes	No	Yes
CC000149	Both within and beyond pelvic cavity	squamous cell carcinoma	Symptoms	LACC	1973-05-16	41	2012-04-11	2014-02-01	22.0333	IIA			Surgery	Yes	Chemotherapy plus radiotherapy	Yes	Chemotherapy plus radiotherapy	Chemotherapy plus radiotherapy	Open surgery	RH	No	backache			Iliac lymph nodes, Para-aortic lymph nodes	No	No
CC000156	Both within and beyond pelvic cavity	squamous cell carcinoma	Physical examination	LACC	1953-09-10	61	2014-07-21	2015-04-20	9.1	IIA1		Grade 2	Surgery	Yes	Chemotherapy	Yes	Chemotherapy plus radiotherapy	Radiotherapy plus chemotherapy	laparoscopy	RH	No				Left supraclavicular lymph node, Iliac lymph nodes, Para-aortic lymph nodes	No	Yes
CC000272	Both within and beyond pelvic cavity	squamous cell carcinoma	Symptoms	LACC	1979-09-07	37	2014-09-15	2016-06-01	20.8333	IIA2		Grade 3	Surgery	Yes	Chemotherapy plus radiotherapy	No			Open surgery	RH	Yes	abnormal defecation (tenesmus), backache			Rectum, Levator ani muscle, Ovary, inguinal lymph nodes	No	Yes
CC000175	Both within and beyond pelvic cavity	squamous cell carcinoma	Imaging	LACC	1966-03-20	49	2014-11-14	2015-05-19	6.96667	IIB		Grade 3	Surgery	Yes	Chemotherapy	Yes	Chemotherapy plus radiotherapy	Radiotherapy plus chemotherapy	Open surgery	RH	No			PET-CT	Iliac lymph nodes, Para-aortic lymph nodes	No	No
CC000220	Both within and beyond pelvic cavity	squamous cell carcinoma	Symptoms	LACC	1966-06-15	46	2010-02-01	2012-06-01	28.3667	IIB		Grade 3	Surgery	Yes	Chemotherapy	No			Open surgery	Hysterectomy	No	vaginal bleeding			Vagina, Lymph nodes around intestine	No	Yes
CC000205	Both within and beyond pelvic cavity	squamous cell carcinoma	Serum biomarker	LACC	1965-7--22	52	2016-06-01	2017-09-20	15.8667	IIB		Grade 3	Only CCRT	Yes	Chemotherapy	No							SCCAg		Parametrium, Iliac lymph nodes, Para-aortic lymph nodes	No	Yes
CC000225	Both within and beyond pelvic cavity	squamous cell carcinoma	Serum biomarker	LACC	1960-06-03	55	2012-04-01	2015-05-26	38.3333	IIB		Grade 2	Only CCRT	Yes	Chemotherapy	No							SCCAg		Iliac lymph nodes, Para-aortic lymph nodes	Yes	Yes
CC000243	Both within and beyond pelvic cavity	adenocarcinoma	Imaging	Advanced stage	1967-08-31	50	2016-09-28	2017-06-23	8.93333	IIIB		Grade 3	Only CCRT	Yes	Chemotherapy	No								PET-CT	Ovary, Parametrium, Left supraclavicular lymph node, Left axillary lymph node, Pelvis, Lung	Yes	Yes
CC000255	Both within and beyond pelvic cavity	adenocarcinoma	Physical examination	Advanced stage	1972-09-15	43	2014-10-01	2016-02-29	17.2	IVB	omentum majus		Chemotherapy plus CCRT	No		No									Uterine cervix, Corpus uteri, Parametrium, Vagina, Abdominal wall	No	No
